# Supplementary material for: Bioelectrical impedance vector analysis (BIVA) for measuring the hydration status in young elite synchronized swimmers
Source: PLoS One. 2017 Jun 7;12(6):e0178819. doi: 10.1371/journal.pone.0178819 (PMC5462376; doi:10.1371/journal.pone.0178819)
Supplement: S1 Dataset — (XLSX) [file pone.0178819.s001.xlsx]

## Sheet: BIVA Synchro Data Base
Category	Age (years)	Training vol. (h/week)	Practice years	Training session					Height (cm)	FM (%)	MM (%)	Body Mass (kg)		∆%	BMI (kg/m2)			BMI (kg/m2)				Resistance 50 kHz (R)			Reactance 50 kHz (Xc)			R/h 50 kHz				Xc/h 50 kHz				Phase Angle			Impedance/h (Ω)			Total H2O (L)			Intracellular H2O (L)			Intracellular H2O (%)
				RPE (10)	t (h)	t (min)	Session-RPE	H2O Intake (L)				Pre	Post	∆%	Pre	Post	∆%	<18.5	%	18.5-24.9	%	Pre	Post	∆%	Pre	Post	∆%	Pre	Post	∆%	dif	Pre	Post	∆%	dif	Pre	Post	∆%	Pre	Post	∆%	Pre	Post	∆%	Pre	Post	∆%	Pre	Post
COMEN	12.4932	12.5	4.5	6	2.5	150	900	0.7	156	9.86	40.4	39.7	39.2	-1.25945	16.3133	16.1078	-1.25945	21	61.7647	13	38.2353	499.1	511	2.38429	64.1	66.9	4.36817	319.936	327.564	2.38429	7.62821	41.0897	42.8846	4.36817	1.79487	7.3185	7.45873	1.91607	322.564	330.359	2.41679	29.3	28.7	-2.04778	17	16.7	-1.76471	58.0205	58.1882
COMEN	12.4932	17.5	4	6	2.5	150	900	1	160	9.91	39.7	40	39.9	-0.25	15.625	15.5859	-0.25					547.2	550.8	0.657895	63.7	63.9	0.313972	342	344.25	0.657895	2.25	39.8125	39.9375	0.313972	0.125	6.63996	6.61748	-0.33864	344.31	346.559	0.653304	27.5	27.2	-1.09091	15.2	15	-1.31579	55.2727	55.1471
COMEN	12.6465	12.5	5	6	2.4	144	864	0.4	157	16.93	30.9	42.3	41.9	-0.945626	17.1609	16.9987	-0.945626					532.6	543.9	2.12167	63.2	65.2	3.16456	339.236	346.433	2.12167	7.19745	40.2548	41.5287	3.16456	1.27389	6.76725	6.83571	1.01161	341.616	348.913	2.13622	27	25.6	-5.18519	15	14.5	-3.33333	55.5556	56.6406
COMEN	12.6793	12.5	5	7	2.5	150	1050	0.5	152	23.27	28.9	51.7	51.4	-0.580271	22.3771	22.2472	-0.580271					528.3	536.7	1.59001	64.5	65.7	1.86047	347.566	353.092	1.59001	5.52632	42.4342	43.2237	1.86047	0.789474	6.96078	6.97913	0.263604	350.147	355.728	1.59398	29	28.7	-1.03448	16.4	16.3	-0.609756	56.5517	56.7944
COMEN	12.745	17.5	4.7	6	2.5	150	900	0.5	157.2	12.88	36.6	40.8	40.4	-0.980392	16.5103	16.3484	-0.980392					567.1	612.7	8.04091	69.6	77.4	11.2069	360.751	389.758	8.04091	29.0076	44.2748	49.2366	11.2069	4.96183	6.9969	7.19981	2.90004	363.457	392.856	8.08857	26.7	25.6	-4.11985	15.3	14.7	-3.92157	57.3034	57.4219
COMEN	12.7943	12.5	5	7	2.5	150	1050	0.4	146.6	13.13	31.8	37.6	37.2	-1.06383	17.4952	17.3091	-1.06383					608.9	621.7	2.10215	68.6	73.3	6.85131	415.348	424.079	2.10215	8.73124	46.794	50	6.85131	3.206	6.42796	6.72427	4.60972	417.976	427.017	2.16304	23.4	22.4	-4.2735	13.3	12.5	-6.01504	56.8376	55.8036
COMEN	12.8683	12.5	5	6	2.5	150	900	0.3	159	18.1	31.4	45.5	44.8	-1.53846	17.9977	17.7208	-1.53846					586.4	599.7	2.26808	64.9	68.2	5.08475	368.805	377.17	2.26808	8.36478	40.8176	42.8931	5.08475	2.07547	6.31553	6.488	2.73103	371.057	379.601	2.30262	26.4	25.5	-3.40909	14.5	13.8	-4.82759	54.9242	54.1176
COMEN	12.9696	12.5	6	6	2.5	150	900	0.7	150.7	17.1	31.7	43.2	42.5	-1.62037	19.022	18.7138	-1.62037					574.4	588.9	2.52437	68.2	71.1	4.2522	381.155	390.776	2.52437	9.62177	45.2555	47.1798	4.2522	1.92435	6.77118	6.8842	1.66924	383.832	393.614	2.54859	25.5	24.5	-3.92157	14.5	13.6	-6.2069	56.8627	55.5102
COMEN	13.1557	17.5	5	7	2.6	156	1092	0.5	166.8	12.99	37.8	47.1	47.1	0	16.9289	16.9289	0					559.3	584	4.41623	63.6	66.7	4.87421	335.312	350.12	4.41623	14.8082	38.1295	39.988	4.87421	1.85851	6.48744	6.51565	0.434846	337.473	352.396	4.42209	29.9	29.2	-2.34114	16.4	16	-2.43902	54.8495	54.7945
COMEN	13.1913	12.5	6	6	2.5	150	900	0.3	172.3	16.19	37.4	57.1	56.7	-0.700525	19.2338	19.0991	-0.700525					462.1	477.9	3.41917	53	56.4	6.41509	268.195	277.365	3.41917	9.17005	30.7603	32.7336	6.41509	1.9733	6.54288	6.7307	2.87066	269.953	279.29	3.45863	37.7	37.3	-1.06101	21	20.9	-0.47619	55.7029	56.0322
COMEN	13.2433	12.5	5.2	6	2.5	150	900	0.4	154.3	18.52	30.4	44.4	43.8	-1.35135	18.6488	18.3968	-1.35135					608.7	625.6	2.77641	75.7	76.1	0.528402	394.491	405.444	2.77641	10.9527	49.0603	49.3195	0.528402	0.259235	7.0891	6.93557	-2.16574	397.53	408.433	2.74254	25.1	24.8	-1.19522	14.2	14.1	-0.704225	56.5737	56.8548
COMEN	13.4131	17.5	6	6	2.5	150	900	1	167.5	19.23	35.9	57.2	57.1	-0.174825	20.3876	20.352	-0.174825					467.7	488	4.34039	58	62.1	7.06897	279.224	291.343	4.34039	12.1194	34.6269	37.0746	7.06897	2.44776	7.06922	7.25214	2.58758	281.363	293.693	4.38225	37.4	36.7	-1.87166	21.5	21.3	-0.930233	57.4866	58.0381
COMEN	13.4487	17.5	5	7	2.6	156	1092	0.5	160.2	16.17	42.5	46.1	46.1	0	17.9629	17.9629	0					439.7	444.1	1.00068	59	63.6	7.79661	274.469	277.216	1.00068	2.74657	36.829	39.7004	7.79661	2.87141	7.64244	8.14997	6.64099	276.929	280.044	1.12485	36.5	34.1	-6.57534	22.3	20.6	-7.62332	61.0959	60.4106
COMEN	13.4596	12.5	5.5	7	2.5	150	1050	0.5	156.1	21.17	27.7	42.2	41.7	-1.18483	17.3184	17.1132	-1.18483					596.7	603.8	1.18988	74.9	75.1	0.267023	382.255	386.803	1.18988	4.54837	47.9821	48.1102	0.267023	0.128123	7.15456	7.08998	-0.90268	385.255	389.784	1.17563	26.2	24.1	-8.01527	15.1	13.8	-8.60927	57.6336	57.2614
COMEN	13.5582	12.5	6	7	2.5	150	1050	0.5	155.5	13.55	36.1	41.6	41	-1.44231	17.2041	16.956	-1.44231					490.5	530.7	8.19572	60.5	65.6	8.42975	315.434	341.286	8.19572	25.8521	38.9068	42.1865	8.42975	3.27974	7.03155	7.04661	0.214133	317.824	343.884	8.19923	28.9	27.6	-4.49827	16.1	15.7	-2.48447	55.7093	56.8841
COMEN	13.7006	12.5	5	7	2.5	150	1050	0.4	145.7	5.47	35.9	32.8	32.4	-1.21951	15.4509	15.2625	-1.21951					554.8	610.2	9.98558	65.8	73.8	12.1581	380.782	418.806	9.98558	38.0233	45.1613	50.652	12.1581	5.49073	6.76376	6.89608	1.9564	383.451	421.858	10.016	22.6	21	-7.07965	12.7	11.9	-6.29921	56.1947	56.6667
COMEN	13.7471	17.5	5.8	7	2.5	150	1050	0.5	159.9	13.94	50.5	40.5	40.7	0.493827	15.8401	15.9183	0.493827					528.4	566.8	7.26722	61	64.8	6.22951	330.457	354.472	7.26722	24.015	38.1488	40.5253	6.22951	2.37649	6.58524	6.52208	-0.959034	332.651	356.781	7.25364	28.7	26.8	-6.62021	16.5	14.8	-10.303	57.4913	55.2239
COMEN	13.7471	12.5	5.5	7	2.4	144	1008	0.3	160.2	21.76	35.9	52.9	52.3	-1.13422	20.6125	20.3787	-1.13422					489.9	495.4	1.12268	69.2	72.2	4.33526	305.805	309.238	1.12268	3.43321	43.196	45.0687	4.33526	1.87266	8.04003	8.29195	3.13341	308.841	312.505	1.1865	35.1	34.6	-1.4245	21.2	20.8	-1.88679	60.3989	60.1156
COMEN	13.9744	17.5	5	6	2.5	150	900	0.7	154.6	4.33	40.1	34.3	34.1	-0.58309	14.3508	14.2671	-0.58309					603.2	619.3	2.6691	73.7	76.5	3.79919	390.168	400.582	2.6691	10.414	47.6714	49.4825	3.79919	1.81113	6.96597	7.04188	1.08972	393.07	403.627	2.68581	23.6	23.4	-0.847458	13.4	13.4	0	56.7797	57.265
COMEN	14.0428	12.5	6	6	2.5	150	900	0.5	162.6	18.61	37.7	50.9	50.6	-0.589391	19.252	19.1386	-0.589391					493.9	497.5	0.728892	68.2	69.1	1.31965	303.752	305.966	0.728892	2.21402	41.9434	42.4969	1.31965	0.553506	7.86195	7.90748	0.579083	306.634	308.903	0.739978	34.7	34.3	-1.15274	20.7	20.5	-0.966184	59.6542	59.7668
COMEN	14.062	12.5	5	7	2.5	150	1050	0.5	156.5	14.65	35.2	43.4	42.5	-2.07373	17.7199	17.3524	-2.07373					572.5	580.3	1.36245	68.9	70.6	2.46734	365.815	370.799	1.36245	4.98403	44.0256	45.1118	2.46734	1.08626	6.8625	6.93658	1.07948	368.454	373.533	1.3783	26.9	26	-3.34572	15.3	14.6	-4.57516	56.8773	56.1538
COMEN	14.0948	17.5	7	6	2.5	150	900	0.3	163.2	16.04	35.7	46.7	46.5	-0.428266	17.5338	17.4587	-0.428266					552	576.7	4.47464	62.3	67.3	8.02568	338.235	353.37	4.47464	15.1348	38.174	41.2377	8.02568	3.06373	6.43929	6.65622	3.36895	340.383	355.768	4.52005	29.2	28.6	-2.05479	16.1	16	-0.621118	55.137	55.9441
COMEN	14.1961	17.5	7.5	7	2.5	150	1050	0.4	172.6	12.5	39.4	50.6	50.4	-0.395257	16.9851	16.918	-0.395257					528.6	536.9	1.57019	63.8	66.8	4.70219	306.257	311.066	1.57019	4.80881	36.9641	38.7022	4.70219	1.73812	6.88209	7.09218	3.05265	308.48	313.464	1.61584	34.6	33.4	-3.46821	19.9	18.7	-6.03015	57.5145	55.988
COMEN	14.2892	12.5	5	6	2.5	150	900	0.5	165	12.99	38.7	42.7	42	-1.63934	15.6841	15.427	-1.63934					524.9	576	9.73519	60.5	66.1	9.2562	318.121	349.091	9.73519	30.9697	36.6667	40.0606	9.2562	3.39394	6.5749	6.54645	-0.432698	320.227	351.382	9.72892	29.6	27.8	-6.08108	16	15.3	-4.375	54.0541	55.036
COMEN	14.4617	12.5	7.5	6	2.5	150	900	0.3	165.5	19.65	37.3	54.9	54.5	-0.728597	20.0436	19.8976	-0.728597					507.6	508.2	0.118203	67.5	70.4	4.2963	306.707	307.069	0.118203	0.362538	40.7855	42.5378	4.2963	1.75227	7.57468	7.88688	4.12168	309.407	310.002	0.19229	35.6	34.7	-2.52809	21.2	20.5	-3.30189	59.5506	59.0778
COMEN	14.8505	18.5	7	7	2.4	144	1008	0.7	177.1	9.92	41.3	49.4	49.4	0	15.7503	15.7503	0					565.4	585.6	3.57269	61.6	64.7	5.03247	319.255	330.661	3.57269	11.406	34.7826	36.533	5.03247	1.75042	6.21782	6.30475	1.39815	321.144	332.673	3.58994	32.1	31.4	-2.18069	17.6	17.2	-2.27273	54.8287	54.7771
COMEN	14.9135	18.5	7	6	2.5	150	900	0.5	163.1	16.59	39.6	49.5	49.4	-0.20202	18.6079	18.5703	-0.20202					482.7	492.5	2.03025	60.2	62.4	3.65449	295.953	301.962	2.03025	6.00858	36.9099	38.2587	3.65449	1.34887	7.10895	7.22093	1.57524	298.246	304.376	2.05532	33.7	33.3	-1.18694	19.4	19.3	-0.515464	57.5668	57.958
COMEN	15.0887	18.5	7	7	2.3	138	966	1	162.4	16.81	38.9	47.1	47	-0.212314	17.8587	17.8207	-0.212314					501.2	534.5	6.64405	64	64.7	1.09375	308.621	329.126	6.64405	20.5049	39.4089	39.8399	1.09375	0.431034	7.27692	6.90194	-5.15296	311.127	331.528	6.55729	32.6	30.5	-6.44172	18.8	17.2	-8.51064	57.6687	56.3934
COMEN	15.0942	12.5	7.3	6	2.5	150	900	0.3	180	14.8	50.2	54.6	54.1	-0.915751	16.8519	16.6975	-0.915751					569.1	571.4	0.404147	66.3	70.8	6.78733	316.167	317.444	0.404147	1.27778	36.8333	39.3333	6.78733	2.5	6.64499	7.0633	6.29516	318.305	319.872	0.492299	34.7	32.2	-7.20461	19.2	18	-6.25	55.3314	55.9006
COMEN	15.127	18.5	7	7	2.6	156	1092	0.4	175.3	13.77	39.8	55.4	54.9	-0.902527	18.0279	17.8652	-0.902527					501.6	513.2	2.3126	54.8	57.7	5.29197	286.138	292.755	2.3126	6.61723	31.2607	32.915	5.29197	1.65431	6.23486	6.41493	2.88809	287.841	294.6	2.34825	35.6	35.3	-0.842697	19.5	19.4	-0.512821	54.7753	54.9575
COMEN	15.1572	17.5	7.2	6	2.5	150	900	0.5	168.1	17.51	35.9	54.4	54.3	-0.183824	19.2515	19.2161	-0.183824					521.8	560	7.32081	61.9	70.3	13.5703	310.41	333.135	7.32081	22.7246	36.8233	41.8203	13.5703	4.99703	6.76526	7.15524	5.76444	312.587	335.75	7.41003	33.7	32.9	-2.37389	19	18.8	-1.05263	56.3798	57.1429
COMEN	15.2037	17.5	7	7	2.5	150	1050	0.6	163.3	28.07	50.3	58.6	58.4	-0.341297	21.9748	21.8998	-0.341297					480	531.3	10.6875	61	65.7	7.70492	293.938	325.352	10.6875	31.4146	37.3546	40.2327	7.70492	2.87814	7.24252	7.04935	-2.66712	296.302	327.83	10.6407	40.5	37.7	-6.91358	24	22.6	-5.83333	59.2593	59.9469
COMEN	15.2612	12.5	8	6	2.5	150	900	0.5	169.1	17.41	40.8	57.4	56.8	-1.0453	20.0736	19.8637	-1.0453					475.1	488.2	2.75731	65.4	66.6	1.83486	280.958	288.705	2.75731	7.7469	38.6753	39.385	1.83486	0.709639	7.83781	7.76831	-0.88669	283.607	291.379	2.74024	39	37.6	-3.58974	23.3	22.2	-4.72103	59.7436	59.0426
COMEN	15.4173	17.5	7	6	2.5	150	900	0.4	169	14.94	39.8	53.4	53	-0.749064	18.6968	18.5568	-0.749064					480.7	495.5	3.07884	62.9	65	3.33863	284.438	293.195	3.07884	8.7574	37.2189	38.4615	3.33863	1.2426	7.45485	7.47342	0.249184	286.863	295.707	3.08322	36.9	36.3	-1.62602	21.5	21.3	-0.930233	58.2656	58.6777
JUNIOR	15.5761	25	8	7	3.5	210	1470	0.5	167.6	15.87	39.9	52.2	51.6	-1.14943	18.5833	18.3697	-1.14943	4	26.6667	11	73.3333	526.4	526.8	0.0759878	65.4	67.2	2.75229	314.081	314.32	0.0759878	0.238663	39.0215	40.0955	2.75229	1.07399	7.08214	7.26954	2.64603	316.496	316.867	0.117206	35.2	33.5	-4.82955	20.1	19.1	-4.97512	57.1023	57.0149
JUNIOR	15.6746	30	8.5	6	3.7	222	1332	1.1	157	15.11	36.4	44.6	44.5	-0.224215	18.094	18.0535	-0.224215					524.8	532.5	1.46723	66.9	72.7	8.66966	334.268	339.172	1.46723	4.90446	42.6115	46.3057	8.66966	3.69427	7.26472	7.77429	7.0143	336.973	342.318	1.58641	30.4	29.2	-3.94737	17.9	17	-5.02793	58.8816	58.2192
JUNIOR	15.869	25	8.5	7	3.5	210	1470	0.7	169	21.69	38.1	65	64.1	-1.38462	22.7583	22.4432	-1.38462					456.2	499.7	9.53529	60.6	64.9	7.09571	269.941	295.68	9.53529	25.7396	35.858	38.4024	7.09571	2.54438	7.56667	7.40003	-2.20225	272.312	298.164	9.49345	41.8	40.7	-2.63158	24.5	23.8	-2.85714	58.6124	58.4767
JUNIOR	15.8991	30	9	7	3.6	216	1512	0.6	170.3	18.42	40.7	59.1	59	-0.169205	20.3778	20.3434	-0.169205					444.3	453.8	2.13819	62.7	62.7	0	260.893	266.471	2.13819	5.57839	36.8174	36.8174	0	0	8.03259	7.86656	-2.06695	263.478	269.002	2.09687	41.8	41.1	-1.67464	25.3	24.7	-2.37154	60.5263	60.0973
JUNIOR	15.9073	35	8.5	6	3.5	210	1260	0.7	170.6	15.88	38.5	54.2	54	-0.369004	18.6226	18.5539	-0.369004					492.9	507.3	2.92149	61	63	3.27869	288.921	297.362	2.92149	8.4408	35.7562	36.9285	3.27869	1.17233	7.0549	7.07914	0.343549	291.126	299.646	2.92688	38	35.9	-5.52632	22.6	20.8	-7.9646	59.4737	57.9387
JUNIOR	16.0415	25	10.5	7	3.5	210	1470	1	164.2	22.43	34.2	51.6	51.1	-0.968992	19.1383	18.9529	-0.968992					501.1	536.1	6.98463	70.5	78.4	11.2057	305.177	326.492	6.98463	21.3155	42.9354	47.7467	11.2057	4.81121	8.00841	8.32004	3.89126	308.182	329.965	7.06815	34	32.5	-4.41176	20.7	19.6	-5.31401	60.8824	60.3077
JUNIOR	16.0908	30	8	6	3.4	204	1224	0.5	168.5	18.47	39.2	57.5	57.4	-0.173913	20.252	20.2168	-0.173913					468.5	473.8	1.13127	64.4	65.2	1.24224	278.042	281.187	1.13127	3.1454	38.2196	38.6944	1.24224	0.474777	7.82683	7.83531	0.108363	280.656	283.837	1.13333	39.4	38.4	-2.53807	23.7	22.8	-3.79747	60.1523	59.375
JUNIOR	16.099	30	10	7	3.5	210	1470	0.7	163.6	16.81	39	48.5	48.3	-0.412371	18.1207	18.046	-0.412371					494.6	496.9	0.465022	66.8	69.8	4.49102	302.323	303.729	0.465022	1.40587	40.8313	42.665	4.49102	1.83374	7.69175	7.99607	3.95651	305.068	306.711	0.538562	34.7	33.8	-2.59366	20.9	20.2	-3.34928	60.2305	59.7633
JUNIOR	16.1784	35	8	7	3.5	210	1470	0.3	161	20.39	37.8	51.4	51.1	-0.583658	19.8295	19.7137	-0.583658					460.8	500.4	8.59375	64.8	70.8	9.25926	286.211	310.807	8.59375	24.5963	40.2484	43.9752	9.25926	3.72671	8.00473	8.05314	0.604828	289.027	313.903	8.60669	36.5	34.4	-5.75342	22.1	20.9	-5.42986	60.5479	60.7558
JUNIOR	16.2386	35	10	7	3.7	222	1554	1	162	18.76	39.3	51.1	51.1	0	19.4711	19.4711	0					487.7	490.6	0.594628	68	70.9	4.26471	301.049	302.84	0.594628	1.79012	41.9753	43.7654	4.26471	1.79012	7.93758	8.22328	3.59935	303.962	305.986	0.665868	35.6	34.8	-2.24719	21.6	20.8	-3.7037	60.6742	59.7701
JUNIOR	16.5	25	10	7	3.5	210	1470	0.4	167.5	18	36.2	55.8	55.4	-0.716846	19.8886	19.746	-0.716846					500	507	1.4	65	71.2	9.53846	298.507	302.687	1.4	4.1791	38.806	42.5075	9.53846	3.70149	7.40691	7.99399	7.92612	301.019	305.657	1.54058	36.9	35.2	-4.60705	22	21	-4.54545	59.6206	59.6591
JUNIOR	16.715	35	8	8	3.5	210	1680	0.5	160.4	16.08	37.8	45.7	45.2	-1.09409	17.7626	17.5683	-1.09409					516.9	549.4	6.28748	66	75.3	14.0909	322.257	342.519	6.28748	20.2618	41.1471	46.9451	14.0909	5.798	7.2764	7.80425	7.25438	324.873	345.721	6.41718	31	30.1	-2.90323	18	17.8	-1.11111	58.0645	59.1362
JUNIOR	17.0737	30	10	7	3.1	186	1302	1	167.1	18.68	36.9	55	55	0	19.6974	19.6974	0					483	520	7.66046	66.4	70.6	6.3253	289.048	311.191	7.66046	22.1424	39.7367	42.2501	6.3253	2.51346	7.82762	7.73173	-1.22506	291.767	314.046	7.63584	37.4	35.5	-5.08021	22.4	21.1	-5.80357	59.893	59.4366
JUNIOR	17.1668	30	10	6	3.5	210	1260	0.6	174	23.8	44.5	56.6	56.4	-0.353357	18.6947	18.6286	-0.353357					546.4	576.7	5.54539	70.1	75.9	8.27389	314.023	331.437	5.54539	17.4138	40.2874	43.6207	8.27389	3.33333	7.31079	7.49766	2.5561	316.597	334.295	5.59013	37.3	36.3	-2.68097	22.3	21.8	-2.24215	59.7855	60.0551
JUNIOR	17.8485	30	10	7	3.1	186	1302	0.3	172.1	19.09	43.2	53.7	53.3	-0.744879	18.1306	17.9956	-0.744879					573.7	607.1	5.82186	68.3	73.7	7.9063	333.353	352.76	5.82186	19.4073	39.6862	42.8239	7.9063	3.13771	6.78921	6.92166	1.95083	335.707	355.35	5.85127	32.9	31.1	-5.47112	19.1	17.7	-7.32984	58.0547	56.9132
MEAN	13.8703	14.9706	5.93235	6.44118	2.49412	149.647	963.882	0.514706	161.894	15.5518	37.7118	47.2353	46.8853	-0.762997	17.9633	17.8265	-0.762997					529.474	548.794	3.67265	64.4265	67.7294	5.21707	328.416	340.456	3.67265	12.0395	39.9715	42.0192	5.21707	2.04764	6.95734	7.05994	1.49693	330.85	343.05	3.69538	31.0559	29.9941	-3.4589	17.7382	17.1176	-3.53585	56.9956	56.9392
SD	0.92371	2.6769	1.06734	0.503995	0.0547234	3.28341	78.4933	0.192484	8.2072	4.69405	5.43272	6.95178	6.97477	0.580208	1.86165	1.85509	0.580208					46.0849	48.5157	2.98722	5.06038	4.95009	3.30803	38.7697	41.0086	2.98722	9.87852	4.49981	4.57177	3.30803	1.33353	0.471663	0.490724	2.51434	38.9397	41.1659	2.97384	4.92908	4.87268	2.24373	3.12507	3.08097	2.82904	1.76353	1.69373
MEAN	16.3252	30	9.13333	6.8	3.47333	208.4	1416.4	0.66	166.327	18.632	38.78	53.4667	53.1667	-0.556305	19.2948	19.1867	-0.556305					498.487	518.54	4.04151	65.7933	70.1533	6.55961	299.873	311.91	4.04151	12.0373	39.5959	42.2362	6.55961	2.64037	7.53875	7.71778	2.42382	302.483	314.764	4.08456	36.1933	34.8333	-3.79308	21.5467	20.6067	-4.38819	59.5001	59.1279
SD	0.628829	3.77964	0.95369	0.560612	0.170992	10.2595	129.293	0.261315	4.80245	2.55948	2.632	5.19473	5.13067	0.437671	1.27567	1.25338	0.437671					35.0701	38.8558	3.27858	2.89987	4.75513	3.87412	21.6468	23.4037	3.27858	9.59216	2.23697	3.44698	3.87412	1.61459	0.400799	0.407367	3.25945	21.6576	23.5472	3.25975	3.37479	3.45205	1.38182	2.1623	2.17993	1.88643	1.12505	1.16894
MEAN	14.6218	19.5714	6.91224	6.55102	2.79388	167.633	1102.41	0.559184	163.251	16.4947	38.0388	49.1429	48.8082	-0.699724	18.3709	18.2429	-0.699724	12.5	44.2157	12	55.7843	519.988	539.533	3.78557	64.8449	68.4714	5.62805	319.678	331.717	3.78557	12.0388	39.8565	42.0856	5.62805	2.22909	7.13532	7.26132	1.78067	322.166	334.391	3.81452	32.6286	31.4755	-3.5612	18.9041	18.1857	-3.79677	57.7623	57.6092
SD	1.41732	7.62056	1.80839	0.542418	0.467443	28.0466	231.33	0.223531	7.5694	4.37224	4.74964	7.03672	7.04828	0.544587	1.80049	1.79592	0.544587	12.0208	24.8181	1.41421	24.8181	45.0228	47.5083	3.04952	4.5236	4.97142	3.50596	36.6975	38.6344	3.04952	9.69154	3.92566	4.22436	3.50596	1.43496	0.522587	0.554793	2.76248	36.7934	38.7333	3.03515	5.07428	4.98767	2.01053	3.35006	3.24833	2.58802	1.96658	1.84649
[truncated: 13 more columns]
